# Supplementary material
Source: PubMed Central journal article supplement (PMC4543611)
Supplement: bph0172-4038-sd1.pdf [file bph0172-4038-sd1.pdf]

## **Supportive Information**

Interleukin-1 beta Reduces Tonic Contraction of Mesenteric Lymphatic Muscle Cells: Involvement of Cyclooxygenase-2 / Prostaglandin E2

M Al-Kofahi; F Becker; F N E Gavins; M Woolard; I Tsunoda; Y Wang; D Ostanin; D C Zawieja; M Muthuchamy; P Y von der Weid; J S Alexander

Corresponding author:

Jonathan Steven Alexander, PhD

Louisiana State University Health Sciences Center-Shreveport

Department of Molecular & Cellular Physiology

1501 Kings Highway, Shreveport, LA 71130

Email: [jalex@lsuhsc.edu](mailto:jalex@lsuhsc.edu)

Tel: 318-675-4151

Fax: 318-675-4156

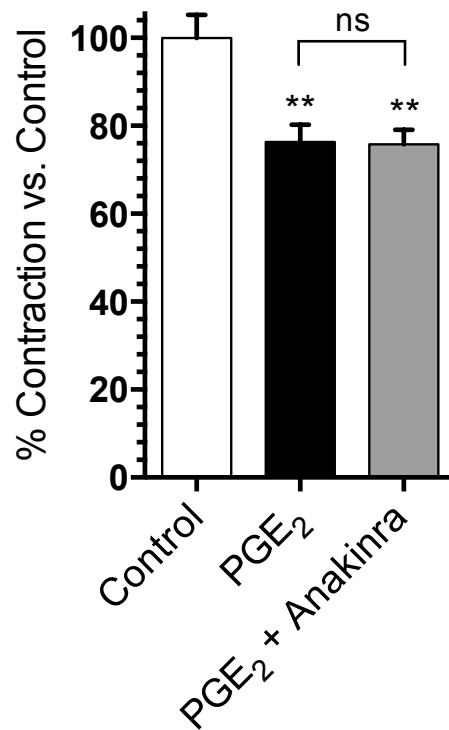

Supportive Figure 1. PGE<sub>2</sub> decreased rat mesenteric lymphatic muscles cell (RMLMC) contractility independent from Anakinra treatment. RMLMC treated with PGE<sub>2</sub> (10<sup>-5</sup> M) for 4 days showed a significantly lower contractility (expressed in % of contraction vs. control) compared with control treated RMLMC, while Anakinra (5 µg/ml) treatment showed no significant effect on the PGE<sub>2</sub> induced relaxation. n=4, \*\* p < 0.01 vs. control, One-way ANOVA, with Bonferroni's post-hoc test; data are mean ± standard error of the mean (SEM).

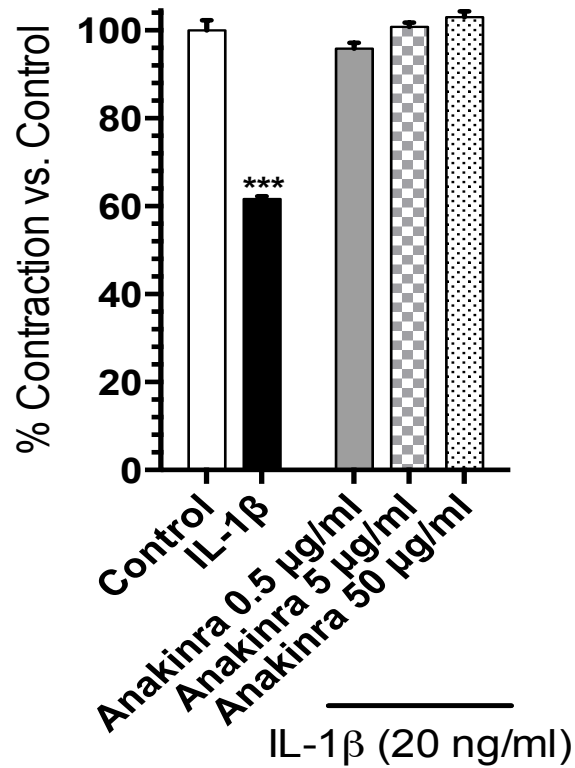

**Supportive Figure 2.** Different doses of Anakinra restored IL-1 $\beta$ -induced decreased rat mesenteric lymphatic muscles cells (RMLMC) contractility. RMLMC treated with IL-1 $\beta$  (20ng/ml) for 4 days showed a significantly lower contractility (expressed in % of contraction vs. control) compared with control treated RMLMC while co-treatment with Anakinra (0.5, 5, 50  $\mu$ g/ml) restored RMLMC relaxation. n=5, \*\*\* p < 0.001 vs. control, One-way ANOVA, with Bonferroni's post-hoc test; data are mean  $\pm$  standard error of the mean (SEM).

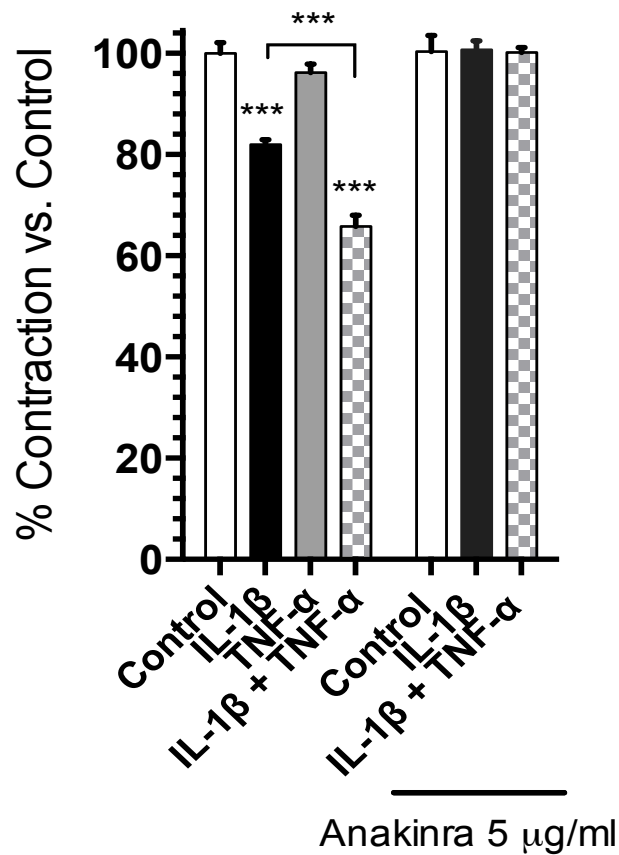

**Supportive Figure 3.** IL-1 $\beta$  + TNF- $\alpha$  exhibit synergistic effects in decreasing RMLMC contractility. IL-1 $\beta$  (20 ng/ml), but not TNF- $\alpha$  (20 ng/ml), decreased RMLMC contractility (expressed in % of contraction vs. control) while IL-1 $\beta$  (20 ng/ml) + TNF- $\alpha$  (20 ng/ml) decrease RMLMC contractility to a greater extent than IL-1 $\beta$  (20 ng/ml) alone. IL-1 receptor antagonist (Anakinra 5  $\mu$ g/ml) maintained RMLMC contractility in the presence of IL-1 $\beta$  or IL-1 $\beta$ +TNF- $\alpha$  at day 4.  $n=4$ , \*\*\*  $p < 0.001$  vs. control, \*\*\*  $p < 0.01$  IL-1 $\beta$  20 ng/ml vs. IL-1 $\beta$  (20 ng/ml)+TNF- $\alpha$  (20 ng/ml). One-way ANOVA, with Bonferroni's post-hoc test; data are mean  $\pm$ SEM.

$$\left( \frac{\left( 1 - \left( \frac{t4}{t0} \right)^{\text{exp.}} \right)}{\left( 1 - \left( \frac{t4}{t0} \right)^{\text{con.}} \right)} \right) \times 100$$

**Supportive Figure 4.** Equation for gel contraction. *exp.* represents the values of the treated gels, whereas *con.* represents the values for the untreated internal control gels.  $t_0$  = day 0,  $t_4$  = day 4. Since we observed slightly different contractile response within our control groups, an own control for each single experimental treatment was set. These individual controls were set as 100% and the results of parallel conducted treatment studies were normalized to this internal control. When for example the control group produced a 70% contraction and a treatment a 35% contraction, then the data are presented as 100% contraction for control and 50% contraction for the treatment group.
